1 LAPORT: REMNANT *CASTANEA DENTATA* IN NORTHWESTERN NEW YORK

2

3

4

5

6 **REMNANT AMERICAN CHESTNUT (*CASTANEA DENTATA* (MARSH.) BORKH.;**  
7 **FAGACEAE) IN UPLAND FORESTS OF NORTHWESTERN NEW YORK**

8

9

10 Robert G. Laport

11

12 *University of Rochester, Department of Biology, River Campus, Rochester, NY 14627 USA.*

13 Present Address: *University of Colorado-Boulder, Department of Ecology & Evolutionary*

14 *Biology, Campus Box 334, Boulder, CO 80309 USA.*

15 email: [rob.laport@gmail.com](mailto:rob.laport@gmail.com)

16

17

1 **Abstract**

2           The American chestnut (*Castanea dentata* [Marsh.] Borkh.; Fagaceae) was an historically  
3 important hardwood species in eastern deciduous forests of the United States and Canada prior to  
4 being nearly eradicated by chestnut blight (*Cryphonectria parasitica* (Murr.) Barr). Several  
5 remnant populations have been identified persisting across fragmented parts of the historical  
6 range. The identification and characterization of remnant *C. dentata* populations is important for  
7 breeding and conservation efforts, as they may represent potential genetic sources of local  
8 adaptation or blight resistance, but much of the historical range remains unsurveyed. Here, I  
9 report the locations, blight infection status, and reproductive status of remnant American  
10 chestnut in upland forested areas of western New York, finding several reproductive/potentially  
11 reproductive trees.

12

1           The American chestnut (*Castanea dentata* [Marsh.] Borkh.; Fagaceae) was an historically  
2 important hardwood species in eastern deciduous forests of the United States and Canada. Once  
3 ranging from southern Maine and Ontario to southern Georgia, and west to the Mississippi River  
4 (Peattie 1950; Russell 1987), often in monotypic stands, *C. dentata* was prized for its suitability  
5 as a rot-resistant construction material and for its edible seeds prior to its near-eradication by the  
6 fungal chestnut blight (*Cryphonectria parasitica* (Murr.) Barr) in the early 1900's (Brooks  
7 1937; Jacobs et al. 2013). Intensive surveys have revealed several fragmented, remnant  
8 populations in parts of Connecticut (Stephens and Waggoner 1980; Paillet 1982, 2002),  
9 Massachusetts (Paillet 1988, 2002), Virginia (Stephensen et al. 1991), Ohio (Schwandron 1995),  
10 and southern Ontario (Tindall et al. 2004). However, significant parts of the historical range that  
11 may harbor remnant populations of *C. dentata* have not been surveyed.

12           The identification and characterization of remnant *C. dentata* individuals and populations  
13 throughout its formerly native range is important as they may represent potential genetic sources  
14 of local adaptation or blight resistance (Steiner 2006). Although active efforts are underway to  
15 identify and breed blight-resistant stocks for re-introduction (Bauman et al. 2012; Jacobs et al.  
16 2013), the current ecological status of wild, remnant populations of *C. dentata* throughout the  
17 native range remains poorly known. Here, I present results from casual field surveys throughout  
18 parts of northwestern New York State (Monroe, Steuben, and Tompkins Counties) where I have  
19 identified remnant individuals and small populations of *C. dentata*.

20

## 21 **Materials & Methods**

22

1           From 2008-2011, several woodland and forest parcels in western New York were  
2 casually surveyed for the presence of *C. dentata*. Most of the surveys were focused on remnant  
3 woodlands in Monroe County including: woodlands on the campus of the University of  
4 Rochester, East Irondequoit Park/Abraham Lincoln Park, Lynch Woods Park, Durand Eastman  
5 Park, and Irondequoit Bay Wetlands Park/Lucien Morin Park. However, two sites broadened the  
6 scope of the surveys to larger parks in Tompkins (Taughannock State Park) and Steuben  
7 Counties (Stony Brook State Park). The land-use and age of the woodland parcels vary  
8 significantly, ranging from eastern old growth beech-maple forest to second growth woodlands  
9 on former agriculture lands. All of the surveyed areas were characterized by being relatively  
10 small (ca. 2 – 90ha; though only a portion of the larger parks was surveyed) and in most cases  
11 were surrounded by a matrix of agriculture and/or suburban habitat.

12           When *C. dentata* individuals were identified, the GPS coordinates for each individual or  
13 group of trees was recorded (WGS 84 datum), the diameter at breast height (DBH) was measured  
14 or estimated, and the height of each stem was estimated. Additionally, the reproductive status,  
15 and chestnut blight infection status was assessed (Table 1). Voucher specimens were collected  
16 for most of the survey sites and deposited at the L.H. Bailey Hortorium Herbarium at Cornell  
17 University.

18

## 19 **Results & Discussion**

20

21           Up until ca. 100 years ago, *Castanea dentata* was one of the most dominant trees of  
22 eastern North American forests (Russell 1987). Being prized for its lumber quality and tendency  
23 to re-sprout from root collars, silviculturalists of the late 19<sup>th</sup> and early 20<sup>th</sup> centuries exerted

1 considerable effort to ensure sustained lumber harvests (Mattoon 1909, Buttrick 1913, Smith  
2 2000). The decimation of *C. dentata* significantly altered eastern forest ecosystems, but the post-  
3 blight ecological significance of *C. dentata* remains relatively unclear. However, significant  
4 effort toward understanding the history (Russell 1987) and genetics (Stillwell et al. 2003;  
5 Kubisiack and Roberds 2006; Shaw et al. 2003) of *C. dentata* are informing current efforts to  
6 breed blight resistant stock (Jacobs et al. 2013; Bauman 2012) and reintroduce the species to its  
7 former range (Paillet 2002).

8 In total, 61 individuals of *C. dentata* were identified in this study, ranging from 1-32  
9 individuals per site (Table 1). About a third of the identified individuals (34.4%) had a single live  
10 stem with a DBH  $\leq 5.0$  cm and could not clearly be classified as root-crown re-sprouts.  
11 However, several individuals (11.5%) were characterized by large (DBH  $\geq 10$  cm) live or dead  
12 trunks surrounded at the base by re-sprouting growth. Many of these re-sprouts were appreciable  
13 in size (DBH ca. 1-3 cm). Only 8.3% of identified individuals were large (DBH  $\geq 20$ cm) and  
14 apparently unaffected by blight at the time of discovery. Most (60%) of these individuals are  
15 reproductive having visible catkins at the time of discovery (Table 1), or are potentially  
16 reproductive with indications of old fruit husks on the forest floor, and should be re-evaluated in  
17 the future.

18 There was not a clear association of woodland type or area with *C. dentata* growth habit,  
19 or the frequency of chestnut blight. All of the surveyed woodlands in the current study tended to  
20 be dominated by American Beech (*Fagus grandifolia*), Red Maple (*Acer rubrum*), Sugar Maple  
21 (*Acer saccharum*), and White Ash (*Fraxinus americana*), but White Oak (*Quercus alba*) and  
22 Shagbark Hickory (*Carya ovata*) were also typically present, and Eastern Hemlock (*Tsuga*  
23 *canadensis*) was also present in the more southern sites. Paillet (1988) found that *C. dentata* was

1 more commonly observed near the edges of remnant forest patches, woodlots, and hedgerows  
2 than within old-growth mesic forest in Connecticut and Massachusetts. Similarly, Tindall et al.  
3 (2004) found that extant *C. dentata* in southern Ontario was associated with deciduous forests  
4 with high canopy cover, but with well-drained sandy soils. Anecdotally, this also seems to be the  
5 case in the current study, suggesting that remnant *C. dentata* in western New York persists in  
6 deciduous forests on well-drained soils. However, these surveys were not systematic, and given  
7 the patchy distribution of identified *C. dentata* it is likely that other individuals and small  
8 populations may exist throughout woodland and larger forest parcels of western New York.

9         While this study contributes to the identification of remnant populations in northwestern  
10 New York, additional surveys in other parts of *C. dentata*'s historical range are essential to  
11 understand the potential genetic sources of adaptation or blight resistance. Characterizing the  
12 degree of local adaptation in *C. dentata* is an important avenue to pursue to help guide future  
13 conservation efforts, yet this remains poorly understood (Steiner 2006). Despite recent molecular  
14 evidence suggesting little genetic structure across the historical range (Kubisiak and Roberds  
15 2006; Shaw et al. 2012), local adaptation of key life history traits, such as cold hardiness, growth  
16 rate, and blight resistance, may be important for successful reintroduction of the species to  
17 certain parts of its historical range (Steiner 2006). Future efforts should investigate the current  
18 range of genetic and phenotypic variation present in remnant populations of *C. dentata*  
19 throughout the historical range by identifying these scattered persistent populations.

20

21 **Acknowledgements**

22

1           The author would like to thank J. Ng for assistance during surveys and input on a draft of  
2 this manuscript, J. Ramsey and T. Ramsey for help identifying some of the surveyed localities.

3

#### 4 **Literature Cited**

5

6 Bauman, J.M., C.H. Keiffer, and S. Hiremath. 2012. Facilitation of American chestnut (*Castanea*  
7 *dentata*) seedling establishment by *Pinus virginiana* in mine restoration. *International*  
8 *Journal of Ecology* 2012: 257326.

9 Brooks, A.B., 1937. *Castanea dentata*. *Castanea* 2: 61-67.

10 Buttrick, P.L., and J.S. Holmes. 1913. Preliminary report on the chestnut in North Carolina made  
11 in connection with a cooperative investigation of the chestnut bark disease, Raleigh, NC:  
12 North Carolina Geological and Economic Survey.

13 Jacobs, D.F., and L.R. Severeid. 2004. Dominance of interplanted American chestnut (*Castanea*  
14 *dentata*) in southwestern Wisconsin, USA. *Forest Ecology and Management* 191: 111-  
15 120.

16 Jacobs, D.F., Dagleish, H.J., and Nelson, C.D. 2013. A conceptual framework for restoration of  
17 threatened plants: the effective model of American chestnut (*Castanea dentata*)  
18 reintroduction. *New Phytologist* 197: 378-393

19 Kubisiak, T.L. and J. Roberds. 2006. Genetic structure of American chestnut populations based  
20 on neutral DNA markers. p. 109–122. In: Steiner, K.C. and J.E. Carlson (eds.).  
21 Restoration of American chestnut to forest lands—Proceedings of a conference and  
22 workshop. May 4–6, 2004, The North Carolina Arboretum. Natural Resources Report  
23 NPS/NCR/CUE/NRR-2006/001. National Park Service, Washington, D.C.

- 1 Mattoon, W.R. 1909. The origin and early development of chestnut sprout. *Forest Quarterly* 7:  
2 34-37.
- 3 Paillet, F.L. 1982. The ecological significance of American chestnut (*Castanea dentata* (Marsh.)  
4 Borkh.) in the Holocene forests of Connecticut. *Bulletin of the Torrey Botanical Club*  
5 109: 457-473.
- 6 Paillet, F.L. 1988. Character and distribution of American chestnut sprouts in southern New  
7 England woodlands. *Bulletin of the Torrey Botanical Club* 115: 32-44.
- 8 Paillet, F.L. 2002. Chestnut: history and ecology of a transformed species. *Journal of*  
9 *Biogeography* 29: 1517-1530.
- 10 Paillet, F.L., and P.A. Rutter. 1989. Replacement of native oak and hickory tree species by the  
11 introduced American chestnut (*Castanea dentata*) in southwestern Wisconsin. *Canadian*  
12 *Journal of Botany* 67: 3457-3469.
- 13 Peattie, D. 1950. *A Natural History of Trees of Eastern and Central North America*. Houghton  
14 Mifflin Company, Boston. MA.
- 15 Russell, E.W.B. 1987. Pre-blight distribution of *Castanea dentata* (Marsh.) Borkh. *Bulletin of*  
16 *the Torrey Botanical Club* 114: 183-190.
- 17 Schwadron, P.A. 1995. Distribution and persistence of American chestnut sprouts, *Castanea*  
18 *dentata* (Marsh.) Borkh., in northeastern Ohio woodlands. *The Ohio Journal of Science*  
19 95: 281-288.
- 20 Shaw, J., J.H. Craddock, and M.A. Binkley. 2012. Phylogeny and phylogeography of North  
21 American *Castanea* Mill. (Fagaceae) using cpDNA suggests gene sharing in the southern  
22 Appalachians (*Castanea* Mill., Fagaceae). *Castanea* 77: 186-211.
- 23 Smith, D.M. 2000. American chestnut: Ill-fated monarch of the eastern hardwood forest. *Journal*



- 1           *of Forestry* 98: 12-15.
- 2   Steiner, K.C. 2006. Regional adaptation in American chestnut. pp 123-128. In: Steiner, K.C. and  
3           J.E. Carlson (eds.). Restoration of American chestnut to forest lands—Proceedings of a  
4           conference and workshop. May 4–6, 2004, The North Carolina Arboretum. Natural  
5           Resources Report NPS/NCR/CUE/NRR-2006/001. National Park Service, Washington,  
6           D.C.
- 7   Stephens, G.R., and P.E. Waggoner. 1980. A half century of natural transitions in mixed  
8           hardwood forests. Bulletin 783. The Connecticut Agricultural Experiment Station, New  
9           Haven.
- 10   Stephenson, S.L., H.S. Adams, and M.L. Lipford. 1991. The present distribution of chestnut in  
11           the upland forest communities of Virginia. *Bulletin of the Torrey Botanical Club* 118: 24-  
12           32.
- 13   Stillwell, K.L., H.M. Wilbur, C.R. Werth, and D.R. Taylor. 2003. Heterozygote advantage in the  
14           American chestnut, *Castanea dentata* (Fagaceae). *American Journal of Botany* 90: 207-  
15           213.
- 16   Tindall, J.R., J.A. Gerrath, M. Melzer, K. McKendry, B.C. Husband, and G.J. Boland. 2004.  
17           Ecological status of American chestnut (*Castanea dentata*) in its native range in Canada.  
18           *Canadian Journal of Forest Research* 34: 2554-2563.
- 19
- 20
- 21

Table 1. Locations and life-history status of *Castanea dentata* identified in woodlands of upstate New York. Asterisks (\*) denote individuals for which voucher specimens were collected. Reproductive status; N = non-reproductive, R = reproductive. Blight status; N = no visible signs of being afflicted by blight, B = visibly afflicted by blight or a dead trunk.

| Plant ID | Date      | Locality Name        | County   | Lat. (°N) | Long. (°W) | DBH (cm) | Height (m) | Status                         | Reprod. Status | Blight Status | Co-occurring Species                                                                                                                                                                                                                                                                                    |
|----------|-----------|----------------------|----------|-----------|------------|----------|------------|--------------------------------|----------------|---------------|---------------------------------------------------------------------------------------------------------------------------------------------------------------------------------------------------------------------------------------------------------------------------------------------------------|
| UR1*     | 20Aug2008 | UR Woodlands         | Monroe   | 43.1101   | 77.6396    | 21.6     | 15         | live single stem               | R?             | N             | <i>Fagus grandifolia</i> , <i>Acer saccharum</i> , <i>Acer rubrum</i> , <i>Fraxinus americana</i> , <i>Carya ovata</i> , <i>Quercus alba</i> , <i>Prunus serotina</i> , <i>Populus deltoides</i> , <i>Juglans nigra</i> , <i>Liriodendron tulipifera</i> , <i>Sassafras albidum</i> , <i>Ulmus</i> spp. |
| UR2*     | 20Aug2008 | UR Woodlands         | Monroe   | 43.1101   | 77.6396    | 12.7     | 15         | live single stem               | N              | N             |                                                                                                                                                                                                                                                                                                         |
| UR3*     | 20Aug2008 | UR Woodlands         | Monroe   | 43.1099   | 77.6398    | 26.4     | 20         | dead trunk, re-sprouts at base | N              | B             |                                                                                                                                                                                                                                                                                                         |
| UR4*     | 20Aug2008 | UR Woodlands         | Monroe   | 43.1094   | 77.6397    | 7.1      | 12         | live single stem               | N              | N             |                                                                                                                                                                                                                                                                                                         |
| UR5*     | 5Sep2008  | UR Woodlands         | Monroe   | 43.1093   | 77.6386    | 19.8     | 20         | dead trunk, re-sprouts at base | N              | B             |                                                                                                                                                                                                                                                                                                         |
| UR6*     | 5Sep2008  | UR Woodlands         | Monroe   | 43.1095   | 77.6393    | 8.5      | 15         | live single stem               | N              | N             |                                                                                                                                                                                                                                                                                                         |
| SB1*     | 19Oct2008 | Stony Brook SP       | Steuben  | 42.5148   | 77.6926    | 4.0      | 10         | live single stem               | N              | N             |                                                                                                                                                                                                                                                                                                         |
| SB2      | 19Oct2008 | Stony Brook SP       | Steuben  | 42.5148   | 77.6926    | 5.0      | 10         | live single stem               | N              | N             |                                                                                                                                                                                                                                                                                                         |
| SB3*     | 19Oct2008 | Stony Brook SP       | Steuben  | 42.5147   | 77.6918    | 2.0      | 5          | dead trunk, re-sprouts at base | N              | B             |                                                                                                                                                                                                                                                                                                         |
| SB4      | 19Oct2008 | Stony Brook SP       | Steuben  | 42.5147   | 77.6918    | 3.0      | 5          | live trunk, re-sprouts at base | N              | B             |                                                                                                                                                                                                                                                                                                         |
| SB5      | 19Oct2008 | Stony Brook SP       | Steuben  | 42.5147   | 77.6918    | 4.0      | 10         | live single stem               | N              | N             | <i>Quercus alba</i> , <i>Tsuga canadensis</i> , <i>Acer saccharum</i> , <i>Fraxinus americana</i>                                                                                                                                                                                                       |
| SB6      | 19Oct2008 | Stony Brook SP       | Steuben  | 42.5147   | 77.6918    | 2.0      | 5          | dead trunk, re-sprouts at base | N              | B             |                                                                                                                                                                                                                                                                                                         |
| SB7      | 19Oct2008 | Stony Brook SP       | Steuben  | 42.5147   | 77.6918    | 5.0      | 10         | live single stem               | N              | N             |                                                                                                                                                                                                                                                                                                         |
| SB8      | 19Oct2008 | Stony Brook SP       | Steuben  | 42.5147   | 77.6918    | 4.0      | 10         | live single stem               | N              | N             |                                                                                                                                                                                                                                                                                                         |
| SB9      | 19Oct2008 | Stony Brook SP       | Steuben  | 42.5147   | 77.6918    | 3.0      | 8          | live trunk, re-sprouts at base | N              | B             |                                                                                                                                                                                                                                                                                                         |
| SB10     | 19Oct2008 | Stony Brook SP       | Steuben  | 42.5147   | 77.6918    | 10.0     | 20         | live single stem               | R?             | N             |                                                                                                                                                                                                                                                                                                         |
| T1*      | 27Jun2009 | Taughannock SP       | Tompkins | 42.5381   | 77.6091    | 4.0      | 10         | live single stem               | N              | N             |                                                                                                                                                                                                                                                                                                         |
| T2       | 27Jun2009 | Taughannock SP       | Tompkins | 42.5381   | 77.6091    | 4.0      | 10         | live single stem               | N              | N             |                                                                                                                                                                                                                                                                                                         |
| T3       | 27Jun2009 | Taughannock SP       | Tompkins | 42.5392   | 77.6058    | 4.0      | 10         | live single stem               | N              | N             |                                                                                                                                                                                                                                                                                                         |
| T4       | 27Jun2009 | Taughannock SP       | Tompkins | 42.5392   | 77.6058    | 20.0     | 15         | live single stem               | N              | N             |                                                                                                                                                                                                                                                                                                         |
| T5       | 27Jun2009 | Taughannock SP       | Tompkins | 42.5392   | 77.6058    | 20.0     | 15         | live single stem               | R              | N             |                                                                                                                                                                                                                                                                                                         |
| EI1*     | 5Oct2009  | East Irondequoit Pk. | Monroe   | 43.1913   | 77.5155    | 3.0      | 5          | dead trunk, re-sprouts at base | N              | B             | <i>Quercus alba</i> , <i>Quercus rubra</i> , <i>Acer rubrum</i> , <i>Acer saccharum</i> , <i>Acer saccharinum</i> , <i>Carya ovata</i> , <i>Sassafras albidum</i> , <i>Liriodendron tulipifera</i> , <i>Fraxinus americana</i>                                                                          |
| EI2      | 5Oct2009  | East Irondequoit Pk. | Monroe   | 43.1918   | 77.5150    | 3.0      | 5          | live single stem               | N              | N             |                                                                                                                                                                                                                                                                                                         |
| EI3      | 5Oct2009  | East Irondequoit Pk. | Monroe   | 43.1918   | 77.5150    | 3.0      | 5          | live single stem               | N              | N             |                                                                                                                                                                                                                                                                                                         |
| EI4      | 5Oct2009  | East Irondequoit Pk. | Monroe   | 43.1918   | 77.5143    | 3.0      | 5          | live single stem               | N              | N             |                                                                                                                                                                                                                                                                                                         |
| EI5      | 5Oct2009  | East Irondequoit Pk. | Monroe   | 43.1912   | 77.5158    | 3.0      | 5          | live single stem               | N              | N             |                                                                                                                                                                                                                                                                                                         |
| LW1      | 24Sep2009 | Lynch Woods Pk.      | Monroe   | 43.1004   | 77.6390    | 20.0     | 15         | live single stem               | R              | N             |                                                                                                                                                                                                                                                                                                         |

|       |           |                      |        |         |         |      |     |                                                       |    |   |                                                                                                                                                                                                                 |
|-------|-----------|----------------------|--------|---------|---------|------|-----|-------------------------------------------------------|----|---|-----------------------------------------------------------------------------------------------------------------------------------------------------------------------------------------------------------------|
| LW2   | 24Sep2009 | Lynch Woods Pk.      | Monroe | 43.1004 | 77.6388 | 12.0 | 10  | live single stem                                      | N  | N | <i>Fagus grandifolia, Acer saccharum, Acer rubrum, Fraxinus americana, Carya ovata, Quercus alba, Prunus serotina, Populus deltoides, Juglans nigra, Liriodendron tulipifera, Sassafras albidum, Ulmus spp.</i> |
| DE1*  | 5Jun2011  | Durand Eastman Pk.   | Monroe | 43.2282 | 77.5638 | 5.0  | 10  | live single stem                                      | N  | N | <i>Fagus grandifolia, Acer saccharum, Acer rubrum, Tsuga canadensis</i>                                                                                                                                         |
| IW1   | 30Jun2011 | Irondequoit Wetlands | Monroe | 43.1666 | 77.5313 | 8.4  | 12  | live single stem, sapling 1m S                        | N  | N | <i>Quercus alba, Quercus rubra, Acer rubrum, Acer saccharum, Acer saccharinum, Carya ovata, Sassafras albidum, Liriodendron tulipifera, Fraxinus americana, Populus deltoides, Ulmus spp</i>                    |
| IW2   | 30Jun2011 | Irondequoit Wetlands | Monroe | 43.1666 | 77.5313 | 7.4  | 10  | live single stem                                      | N  | N |                                                                                                                                                                                                                 |
| IW3   | 30Jun2011 | Irondequoit Wetlands | Monroe | 43.1666 | 77.5313 | 5.3  | 8   | live single stem                                      | N  | N |                                                                                                                                                                                                                 |
| IW4   | 30Jun2011 | Irondequoit Wetlands | Monroe | 43.1668 | 77.5313 | 5.8  | 8   | live single stem                                      | N  | N |                                                                                                                                                                                                                 |
| IW5   | 30Jun2011 | Irondequoit Wetlands | Monroe | 43.1668 | 77.5313 | 3.6  | 2.5 | live single stem                                      | N  | N |                                                                                                                                                                                                                 |
| IW6   | 30Jun2011 | Irondequoit Wetlands | Monroe | 43.1668 | 77.5313 | 8.9  | 13  | live single stem, re-sprouts at base                  | N  | N |                                                                                                                                                                                                                 |
| IW7   | 30Jun2011 | Irondequoit Wetlands | Monroe | 43.1668 | 77.5313 | 3.1  | 3   | live single stem                                      | N  | N |                                                                                                                                                                                                                 |
| IW8   | 30Jun2011 | Irondequoit Wetlands | Monroe | 43.1669 | 77.5313 | 6.1  | 12  | live single stem, re-sprouts ~5m N, 1m S (3.8 cm DBH) | N  | N |                                                                                                                                                                                                                 |
| IW9   | 30Jun2011 | Irondequoit Wetlands | Monroe | 43.1666 | 77.5314 | 6.9  | 8   | live single stem                                      | N  | N |                                                                                                                                                                                                                 |
| IW10* | 30Jun2011 | Irondequoit Wetlands | Monroe | 43.1664 | 77.5321 | 2.5  | 1.5 | dead trunk, re-sprouts at base                        | N  | B |                                                                                                                                                                                                                 |
| IW11  | 30Jun2011 | Irondequoit Wetlands | Monroe | 43.1656 | 77.5301 | 5.3  | 3   | live single stem                                      | N  | N |                                                                                                                                                                                                                 |
| IW12  | 30Jun2011 | Irondequoit Wetlands | Monroe | 43.1650 | 77.5289 | 5.3  | 0.5 | 2 dead trunks, re-sprouts at base                     | N  | B |                                                                                                                                                                                                                 |
| IW13  | 30Jun2011 | Irondequoit Wetlands | Monroe | 43.1649 | 77.5288 | 5.3  | 7   | 2 trunks, re-sprouts 3m W & 2m S                      | N  | N |                                                                                                                                                                                                                 |
| IW14  | 30Jun2011 | Irondequoit Wetlands | Monroe | 43.1649 | 77.5288 | 2.0  | 3   | live single stem                                      | N  | N |                                                                                                                                                                                                                 |
| IW15  | 30Jun2011 | Irondequoit Wetlands | Monroe | 43.1650 | 77.5287 | 5.6  | 3   | live single stem, re-sprout 1m N                      | N  | N |                                                                                                                                                                                                                 |
| IW16  | 30Jun2011 | Irondequoit Wetlands | Monroe | 43.1649 | 77.5286 | 21.1 | 20  | live single stem                                      | R? | N |                                                                                                                                                                                                                 |
| IW17  | 30Jun2011 | Irondequoit Wetlands | Monroe | 43.1648 | 77.5284 | 1.3  | 2   | live single stem                                      | N  | N |                                                                                                                                                                                                                 |
| IW18  | 30Jun2011 | Irondequoit Wetlands | Monroe | 43.1648 | 77.5284 | 2.3  | 2   | live single stem                                      | N  | N |                                                                                                                                                                                                                 |
| IW19  | 30Jun2011 | Irondequoit Wetlands | Monroe | 43.1648 | 77.5284 | 6.9  | 4   | live single stem                                      | N  | N |                                                                                                                                                                                                                 |
| IW20  | 30Jun2011 | Irondequoit Wetlands | Monroe | 43.1648 | 77.5284 | 6.4  | 7   | live single stem                                      | N  | N |                                                                                                                                                                                                                 |
| IW21  | 30Jun2011 | Irondequoit Wetlands | Monroe | 43.1649 | 77.5284 | 6.1  | 7   | live single stem                                      | N  | N |                                                                                                                                                                                                                 |

|      |           |                      |        |         |         |      |    |                                                   |   |   |
|------|-----------|----------------------|--------|---------|---------|------|----|---------------------------------------------------|---|---|
| IW22 | 30Jun2011 | Irondequoit Wetlands | Monroe | 43.1648 | 77.5283 | 11.2 | 15 | live single stem,<br>re-sprout 1m E               | N | N |
| IW23 | 30Jun2011 | Irondequoit Wetlands | Monroe | 43.1647 | 77.5283 | 10.9 | 15 | live single stem                                  | N | N |
| IW24 | 30Jun2011 | Irondequoit Wetlands | Monroe | 43.1647 | 77.5283 | 6.4  | 8  | live single stem                                  | N | N |
| IW25 | 30Jun2011 | Irondequoit Wetlands | Monroe | 43.1647 | 77.5282 | 9.1  | 10 | live single stem                                  | N | N |
| IW26 | 30Jun2011 | Irondequoit Wetlands | Monroe | 43.1647 | 77.5283 | 4.3  | 5  | dead trunk, re-<br>sprouts at base                | N | B |
| IW27 | 30Jun2011 | Irondequoit Wetlands | Monroe | 43.1646 | 77.5281 | 10.9 | 12 | 2 trunks                                          | N | N |
| IW28 | 30Jun2011 | Irondequoit Wetlands | Monroe | 43.1647 | 77.5281 | 4.1  | 7  | live single stem                                  | N | N |
| IW29 | 30Jun2011 | Irondequoit Wetlands | Monroe | 43.1647 | 77.5280 | 3.6  | 2  | dead trunk, re-<br>sprouts 5m E, 20<br>m E        | N | B |
| IW30 | 30Jun2011 | Irondequoit Wetlands | Monroe | 43.1649 | 77.5279 | 15.2 | 25 | live single stem                                  | N | N |
| IW31 | 30Jun2011 | Irondequoit Wetlands | Monroe | 43.1650 | 77.5279 | 18.8 | 30 | dead trunk, re-<br>sprouts 2m N, 3m<br>E, 1 m N   | N | B |
| IW32 | 30Jun2011 | Irondequoit Wetlands | Monroe | 43.1655 | 77.5279 | 3.6  | 3  | dead trunk, re-<br>sprouts 5m W, 10<br>m W, 2 m N | N | B |
